# Supplementary material for: Spectrum of Genetic Mutations in Korean Pediatric Acute Lymphoblastic Leukemia
Source: MDPI journal article supplement (doi:10.3390/jcm11216298), 2022-10-26
Supplement: s1 [file s1]

**Supplementary Table S1.** Gene targets of SM acute leukemia panel

|                             |                                                                                                                                                                                                                                                                                          |
|-----------------------------|------------------------------------------------------------------------------------------------------------------------------------------------------------------------------------------------------------------------------------------------------------------------------------------|
| <b>RAS pathway</b>          | <i>KRAS, NF1, NRAS, FLT3, PTPN11</i>                                                                                                                                                                                                                                                     |
| <b>Receptor/kinase</b>      | <i>FBXW7, JAK1, JAK2, JAK3, NOTCH1, NOTCH3</i>                                                                                                                                                                                                                                           |
| <b>Tumor suppressor</b>     | <i>CDKN2A, CDKN2B, PTEN, TP53, RB1</i>                                                                                                                                                                                                                                                   |
| <b>Transcription factor</b> | <i>CREBBP, ETV6, GATA1, GATA2, GATA3, IKZF1, MYC, NT5C2, SETD2</i>                                                                                                                                                                                                                       |
| <b>Others</b>               | <i>ANKRD26, ASXL1, BCOR, BRAF, CALR, CBL, CHEK1, CSF3R, DDX41, DNMT3A, EGFR, EP300, ERG, EZH2, FAM5C, HNRNPK, IDH1, IDH2, IL7R, KIT, KMT2A, MPL, NPM1, PAX5, PDGFRA, PHF6, PRAME, RAD21, RUNX1, SETBP1, SF3B1, SH2B3, SMC1A, SMC3, SRSF2, STAG2, TERT, TET2, TPMT, U2AF1, WTI, ZRSR2</i> |
